# Supplementary material for: Mechanochemical and solution reactions between AgCH3COO and [H2NC6H10NH2] yield three isomers of the coordination network {Ag[H2NC6H10NH2]+}∞
Source: Royal Society of Chemistry journal article supplement (doi:10.1039/b503404c), 2005-01-01
Supplement: b503404c.pdf [file b503404c.pdf]

## Electronic Supplementary Material

### Mechanochemical and Solution Reactions Between $\text{AgCH}_3\text{COO}$ and $[\text{H}_2\text{NC}_6\text{H}_{10}\text{NH}_2]$ Yield Three Isomers of the Coordination Network $\{\text{Ag}[\text{H}_2\text{NC}_6\text{H}_{10}\text{NH}_2]^+\}_\infty$

Dario Braga, Marco Curzi, Fabrizia Grepioni and Marco Polito

*Dipartimento di Chimica G. Ciamician, Università di Bologna, Via Selmi 2, 40126 Bologna, Italy;  
E-mail: dario.braga@unibo.it*

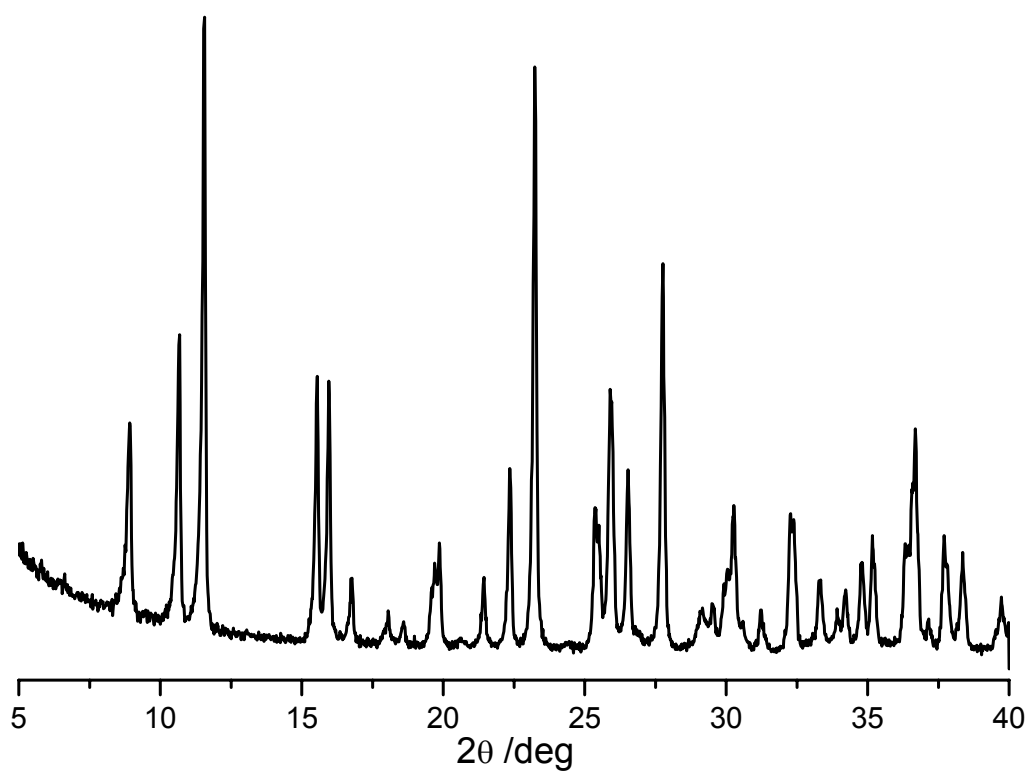

Figure 1. Observed X-ray powder pattern for  $1 \cdot n\text{H}_2\text{O}$

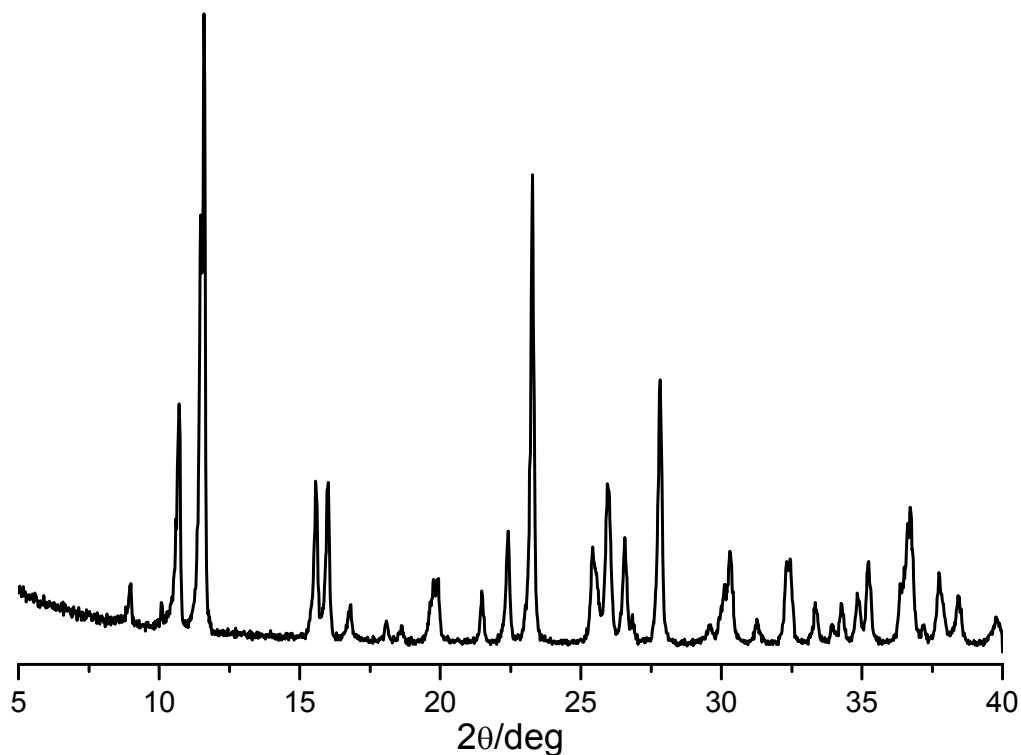

Figure 2. Observed X-ray powder pattern for **1·MeOH·0.5H<sub>2</sub>O** after grinding. Note how the pattern coincides with that observed for **1·nH<sub>2</sub>O**

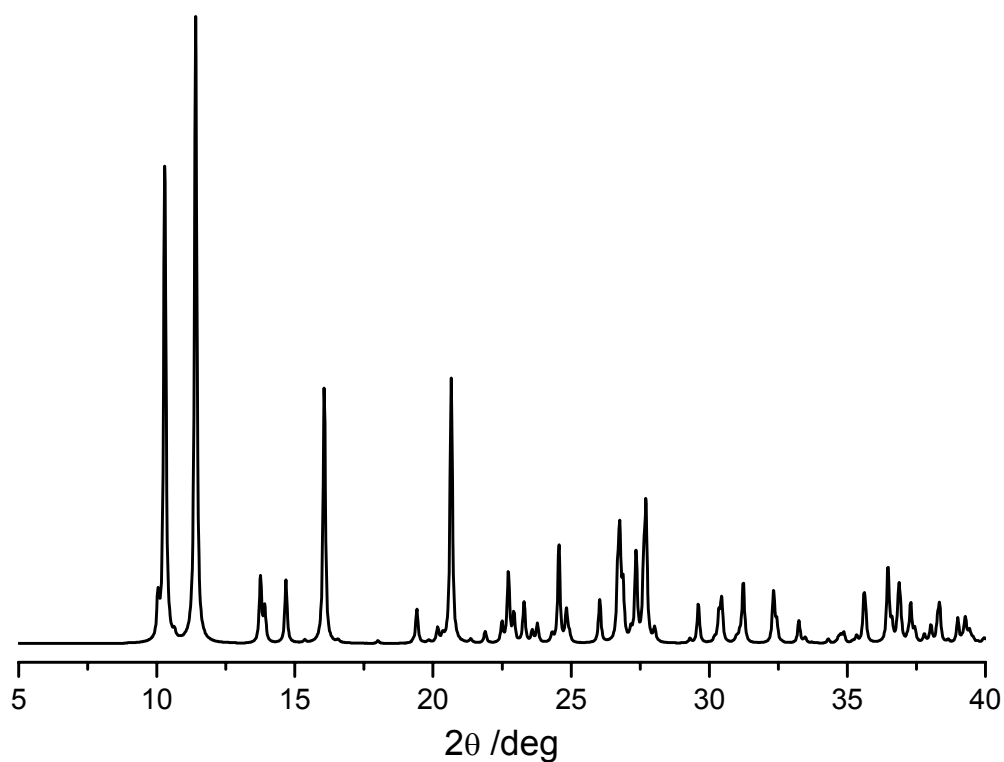

Figure 3. Calculated X-ray powder pattern for **1·MeOH·0.5H<sub>2</sub>O**

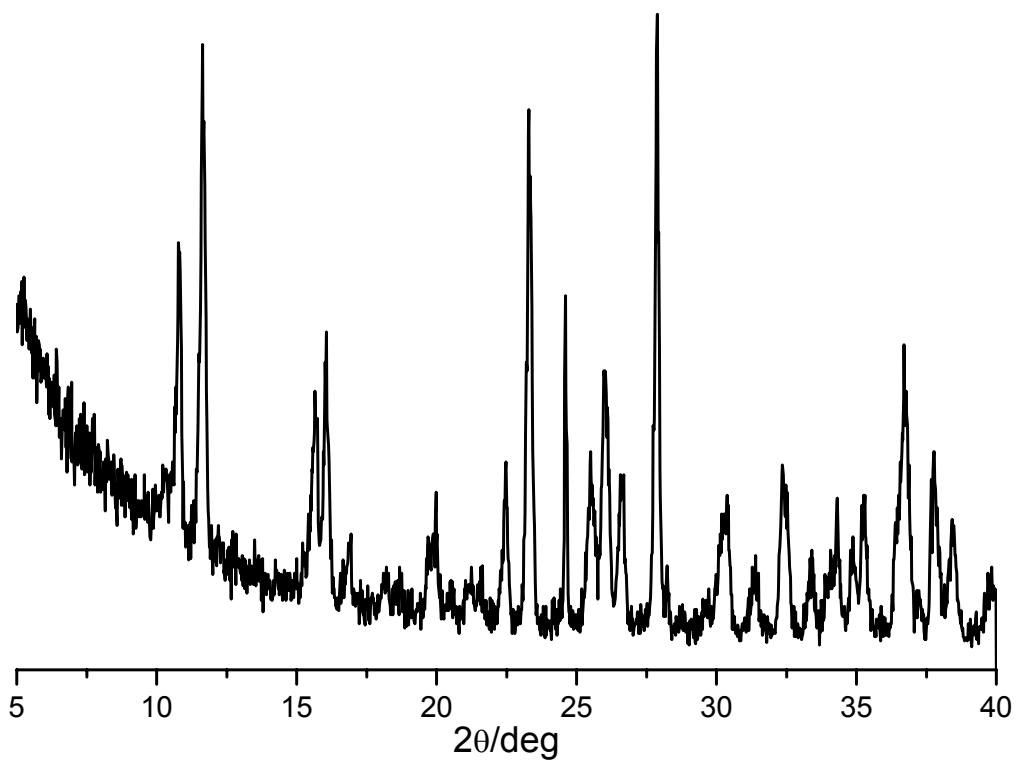

Figure 4. Observed X-ray powder pattern for **1·3H<sub>2</sub>O** after grinding. Note how the pattern coincides with that observed for **1·nH<sub>2</sub>O**

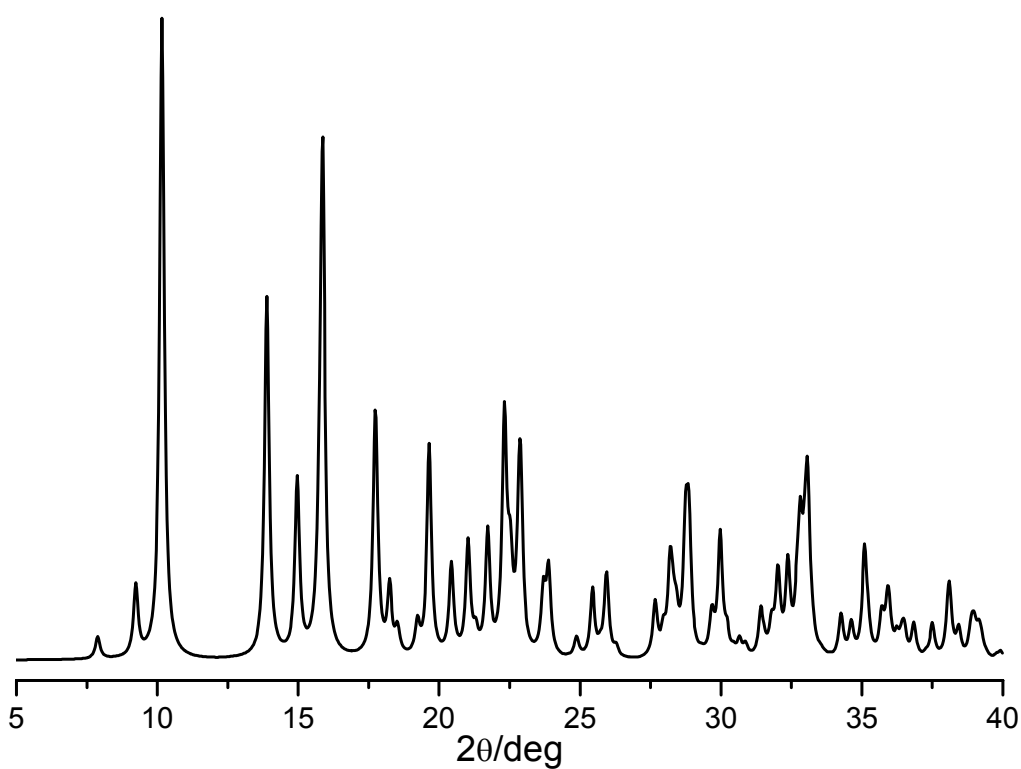

Figure 5. Calculated X-ray powder pattern for **1·nH<sub>2</sub>O**

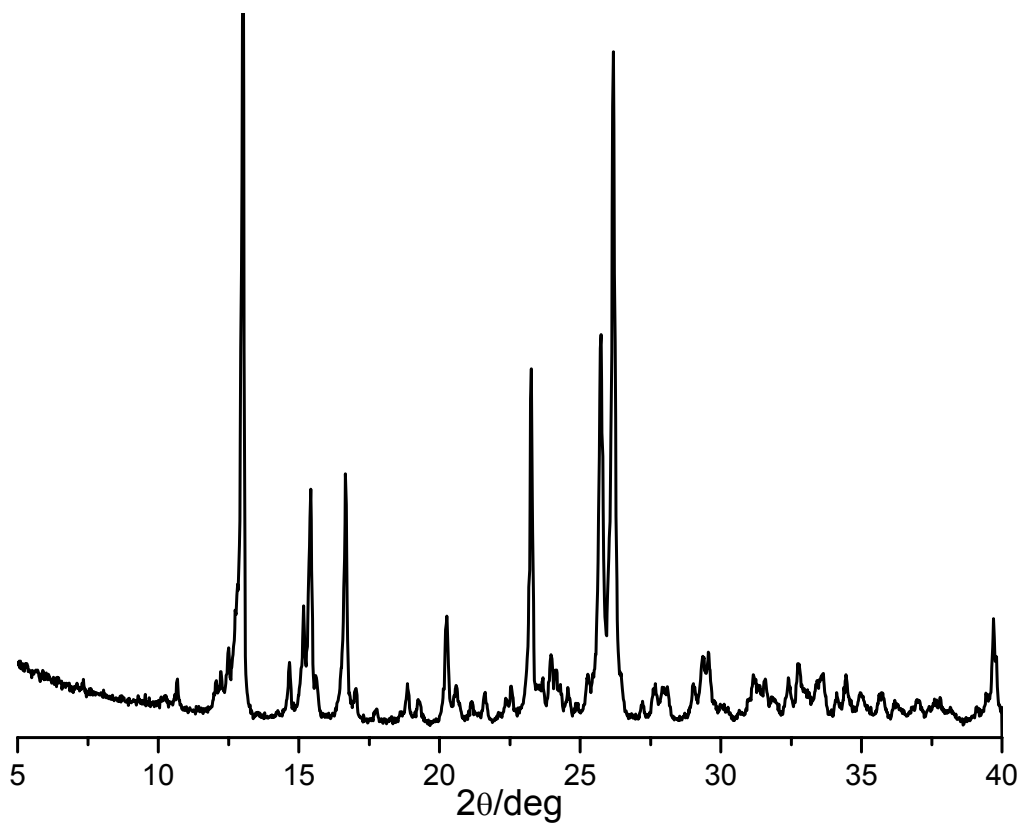

Figure 6. Observed X-ray powder pattern for **1·4H<sub>2</sub>O**

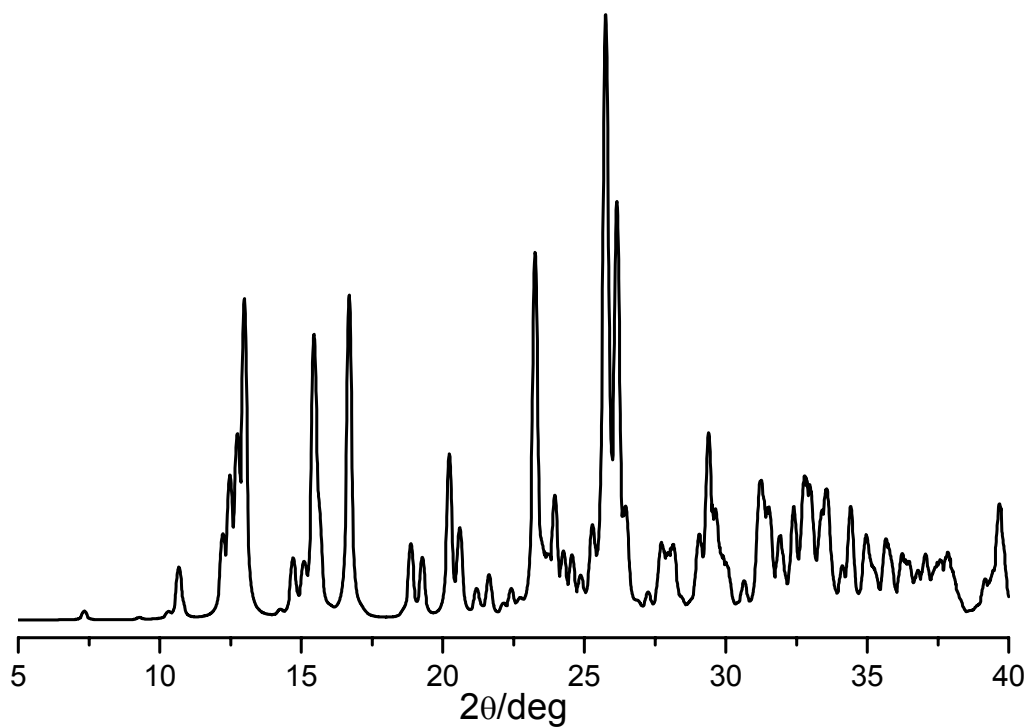

Figure 7. Calculated X-ray powder pattern for **1·4H<sub>2</sub>O**

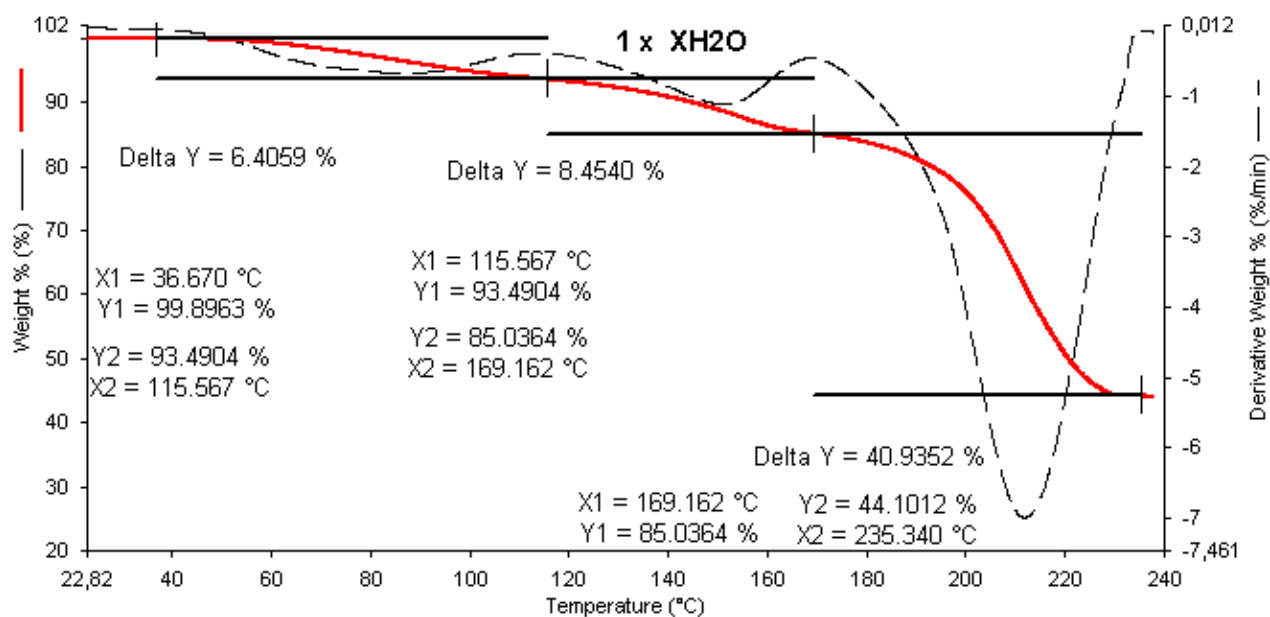

Figure 8. TGA analysis for **1·nH<sub>2</sub>O**, showing that the weight loss corresponds to approximately 2.5 water molecules. At 170°C the sample starts to decompose.

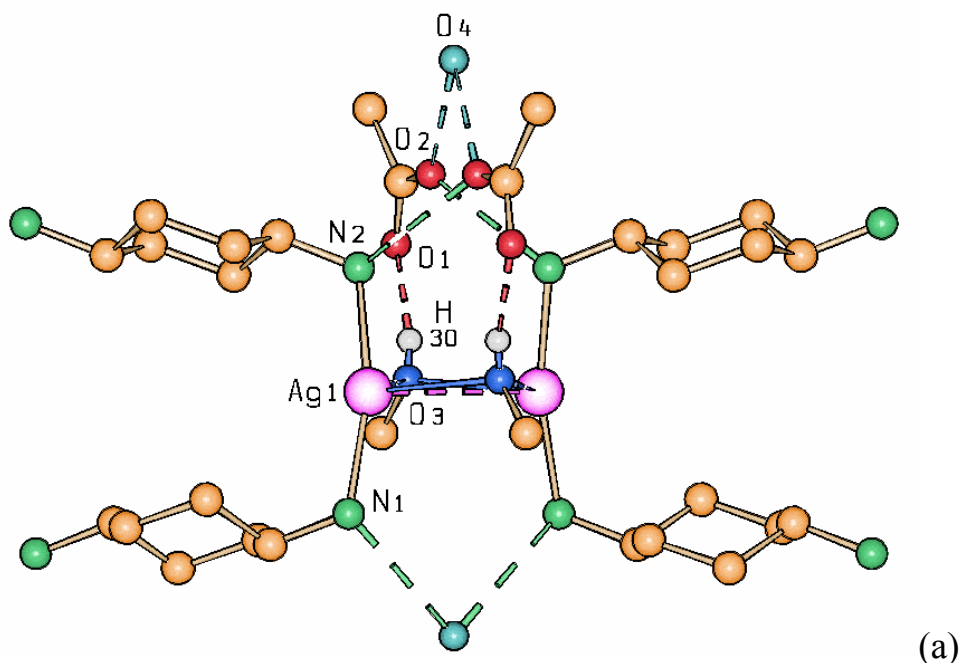

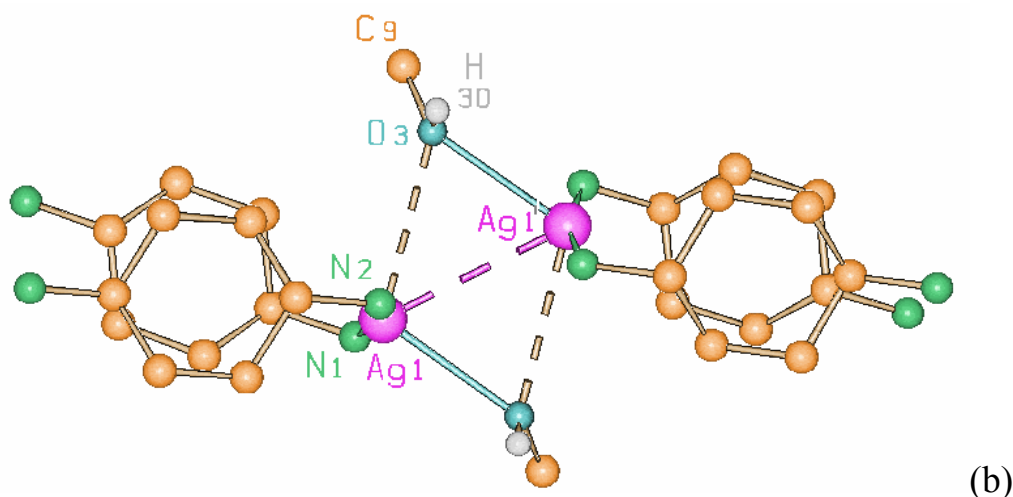

Figure 9. Crystalline **1·MeOH·0.5H<sub>2</sub>O**. (a) The nitrogen atoms belonging to the organic base interact via hydrogen bonding with the acetate anion and the water molecule [ $N(1)\cdots O(1)_{\text{acetate}}^{\text{I}}$  2.972(5),  $N(2)\cdots O(2)_{\text{acetate}}$  3.019(4),  $N(2)\cdots O(2)_{\text{acetate}}^{\text{II}}$  2.993(5),  $N(1)\cdots O(4)_{\text{water}}$  3.036(3) Å], and, in turn, the acetate anion interacts both with the water molecule and the methanol ligand [ $O(3)_{\text{MeOH}}\cdots O(1)_{\text{acetate}}^{\text{II}}$  2.682(5);  $O(2)_{\text{acetate}}\cdots O(4)_{\text{water}}^{\text{III}}$  2.740(4) Å]. (b) The methanol molecule asymmetrically bridges two silver ions belonging to adjacent chains [ $Ag(1)\cdots O(3)_{\text{MeOH}}$  2.693(5),  $Ag(1)\cdots O(3)_{\text{MeOH}}$  3.139(4)<sup>II</sup> Å] [I:  $x, 1-y, -1/2+z$ ; II:  $1-x, y, 1/2-z$ ; III:  $x, -1+y, z$ ].

*Observations:*

1) The  $O_{\text{MeOH}}\cdots Ag$  distance is comparable to or slightly longer than the ones observed for similar interactions in the CSD [2.394 (QEHCAH); 2.446 (QEHCIP); 2.636 Å (TIDJOF)]

2) A search has been run in the CSD for intermolecular interactions (in the range 2.5-3.5 Å) between silver atoms bound to two N atoms each. A total of 63 compounds has been found, with a mean  $Ag\cdots Ag$  distance of 3.266 (19) Å. Therefore the  $Ag\cdots Ag$  distance of 3.323(1) Å observed in crystalline **1·MeOH·0.5H<sub>2</sub>O** is comparable to this mean value.

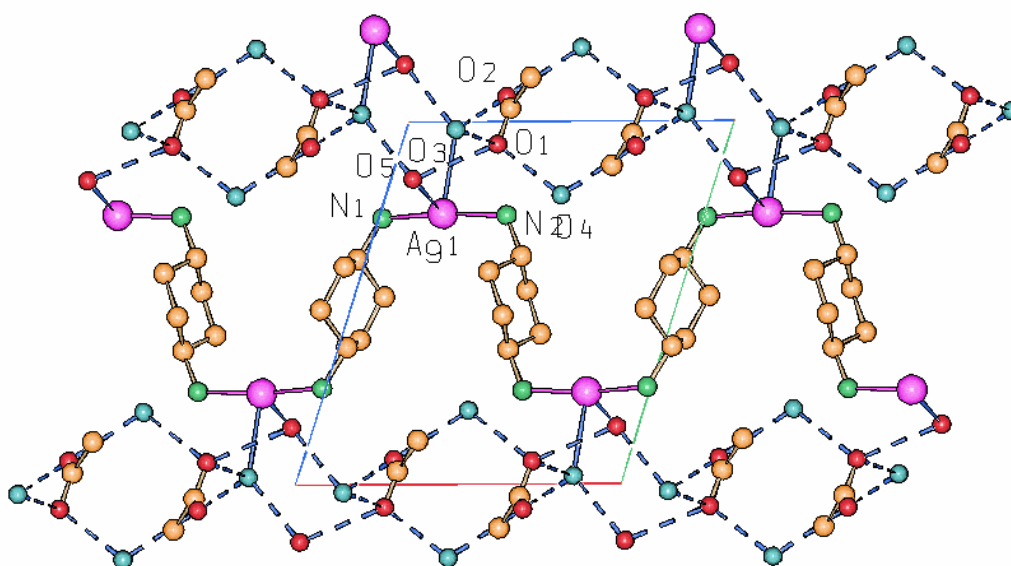

Figure 10. Crystalline **1**·**3H<sub>2</sub>O**. The hydrogen bonded network established between the N-H donor groups on the [H<sub>2</sub>NC<sub>6</sub>H<sub>10</sub>NH<sub>2</sub>] ligand, the acetate anions [O(1) and O(2)] and the water molecules [O(3), O(4) and O(5)]. Relevant hydrogen bonding interactions (e.s.d.s. 0.005 Å): N(1)···O(2) 3.136, N(2)···O(1) 3.099, N(1)···O(5) 3.014, O(5)···O(3) 2.799, N(2)···O(4) 3.040, O(5)···O(1) 2.904, O(4)···O(2) 2.886, O(3)···O(1) 2.817, O(3)···O(2) 2.753 Å.

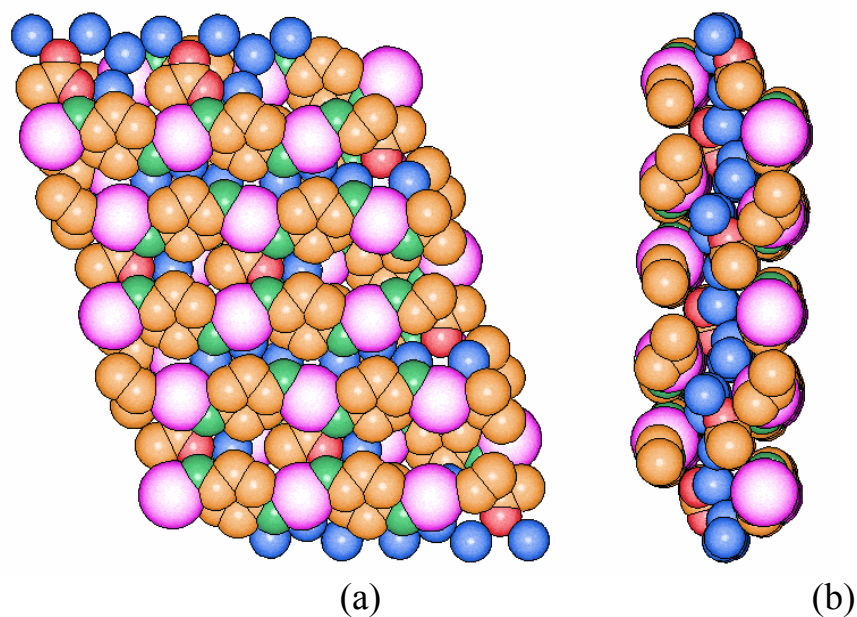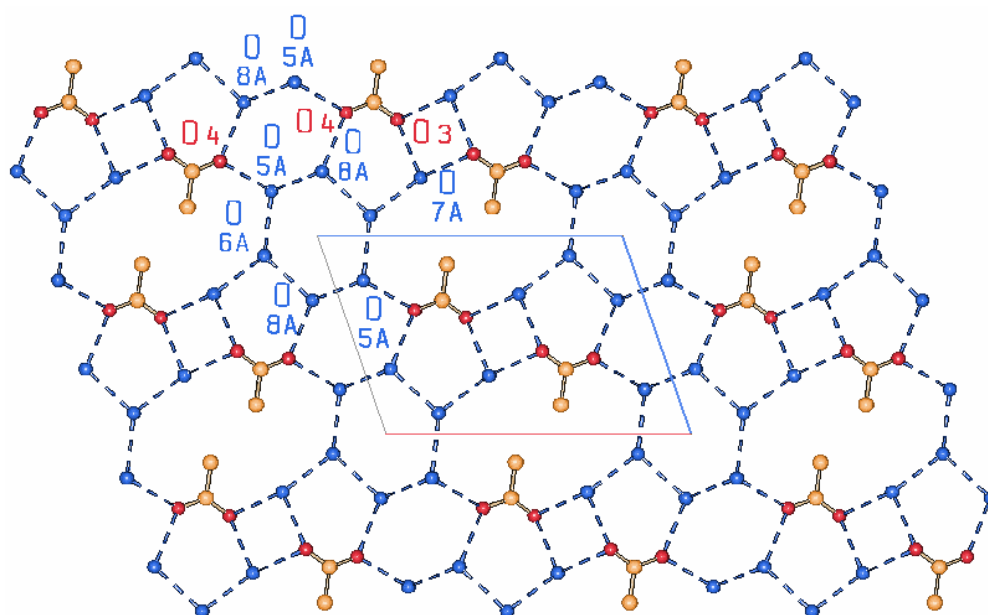

Figure 11. Crystalline **1**·**4H<sub>2</sub>O**. (a) A view of the packing down the *c*-axis, as shown in Figure 3 (main article), together with the acetate anion and water molecules. (b) The same packing portion rotated by 90 deg around the *y* (vertical) axis, showing how the acetate anions and water molecules form a layer that is “sandwiched” in between layers constituted of parallel {Ag[H<sub>2</sub>NC<sub>6</sub>H<sub>10</sub>NH<sub>2</sub>]<sup>+</sup>}<sub>∞</sub>.

# Supplementary Material (ESI) for Chemical Communications  
# This journal is © The Royal Society of Chemistry 2005

chains. There are two such (crystallographically independent) acetate-water layers in the structure; one of the two layers is shown in details in figure 11c. Relevant hydrogen bonding parameters are [O(1), O(2), O(3) and O(4) are the acetate oxygens]: N(1)···O(3A) 3.185(4), N(1)···O(8A) 3.144(4), N(2)···O(1) 3.209(4) 151, N(2)···O(3) 3.284(4), N(3)···O(4A) 3.113(4), N(3)···O(5A) 3.267(4), N(4)···O(1) 3.111(4), N(4)···O(3) 3.021(4), O(1A)···O(1) 2.884(4), O(1A)···O(1) 2.757(4), O(2A)···O(1A) 2.702(4), O(2A)···O(4A) 2.779(4), O(3A)···O(2) 2.849(4), O(3A)···O(2A) 2.761(4), O(4A)···O(2) 2.757(4), O(4A)···O(3A) 2.781(3), O(5A)···O(4) 2.761(4), O(5A)···O(6A) 2.742(4), O(6A)···O(7A) 2.748(4), O(6A)···O(8A) 2.761(4), O(7A)···O(3) 2.891(4), O(7A)···O(3) 2.772(4), O(8A)···O(4) 2.797(4), O(8A)···O(5A) 2.789(4) Å.
